# Supplementary material
Source: PubMed Central journal article supplement (PMC1820735)

**A**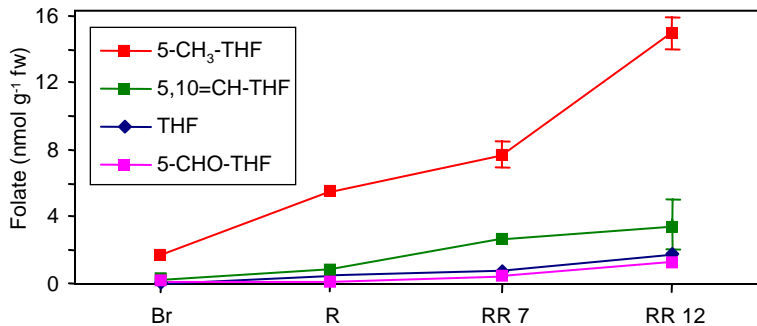**B**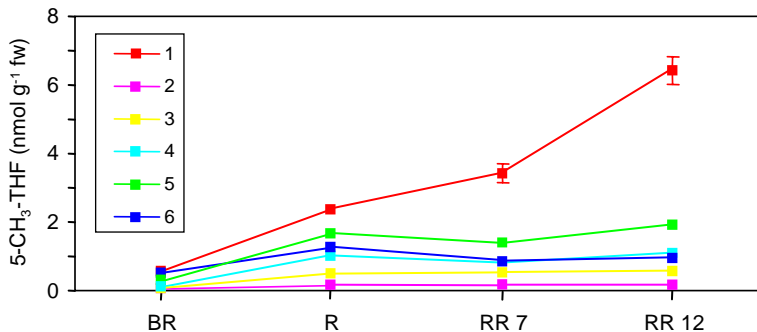

Supplement: pnas_0700409104_1.pdf [file pnas_0700409104_1.pdf]

**A**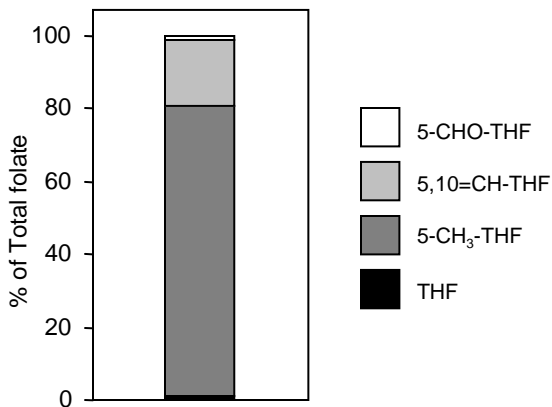**B**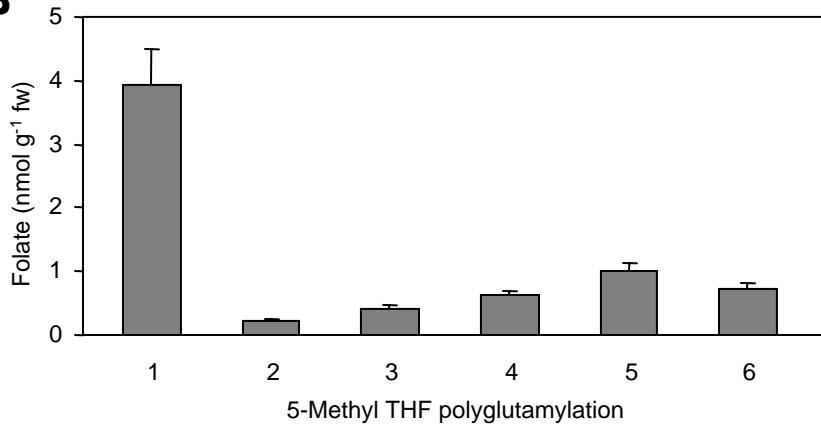

Supplement: pnas_0700409104_2.pdf [file pnas_0700409104_2.pdf]
